# Supplementary material for: Preparations of 25 wt% of Pyraclostrobin Nanosuspension Concentrate (SC) Using Lignosulfonate-Based Colloidal Spheres to Improve Its Thermal Storage Stability
Source: MDPI journal article supplement (doi:10.3390/molecules29071419), 2024-03-22
Supplement: s1 [file s1]

---

## Supplementary Materials

# Preparations of 25 wt% of Pyraclostrobin Nanosuspension Concentrate (SC) Using Lignosulfonate-Based Colloidal Spheres to Improve Its Thermal Storage Stability

Qianqian Tang <sup>2</sup>, Yu Sun <sup>1</sup>, Jinnuo Li <sup>2</sup>, Mingsong Zhou <sup>1,\*</sup>, Dongjie Yang <sup>1</sup> and Yuxia Pang <sup>1</sup>

<sup>1</sup> State Key Laboratory of Pulp and Paper Engineering, School of Chemistry and Chemical Engineering, South China University of Technology, 381 Wushan Road, Tianhe District, Guangzhou 510640, China; lscxcyjy@163.com (Y.S.); cedjyang@scut.edu.cn (D.Y.); ceyxpang@scut.edu.cn (Y.P.)

<sup>2</sup> Henan Key Laboratory of Function-Oriented Porous Materials, College of Chemistry and Chemical Engineering, Luoyang Normal University, 6 Jiqing Road, Yibin District, Luoyang 471934, China; lhltqq1987@163.com (Q.T.); 17333740259@163.com (J.L.)

\* Correspondence: mszhou@scut.edu.cn (M.Z.); Tel.: +86-20-87114722

Number of Pages: 5

Number of Figures: 2

Number of Tables: 2

**Figure S1.** SEM image of pyraclostrobin nano-SC with 10 wt% of glycerin after thermal storage for 7 days.

**Figure S2.** Effects of different pyraclostrobin formulations on growth of flowering cabbage.

**Table S1.** Grinding formula for preparing pyraclostrobin nano-SC.

**Table S2.** Farmland experimental scheme of pyraclostrobin against cabbage downy mildew disease.

---

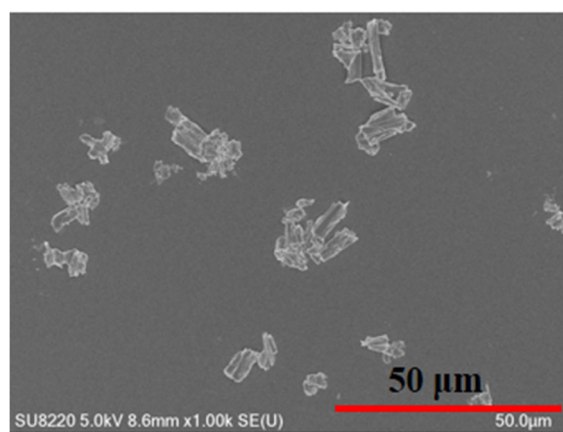

**Figure S1.** SEM image of pyraclostrobin nano-SC with 10 wt% of glycerin after thermal storage for 7 days.

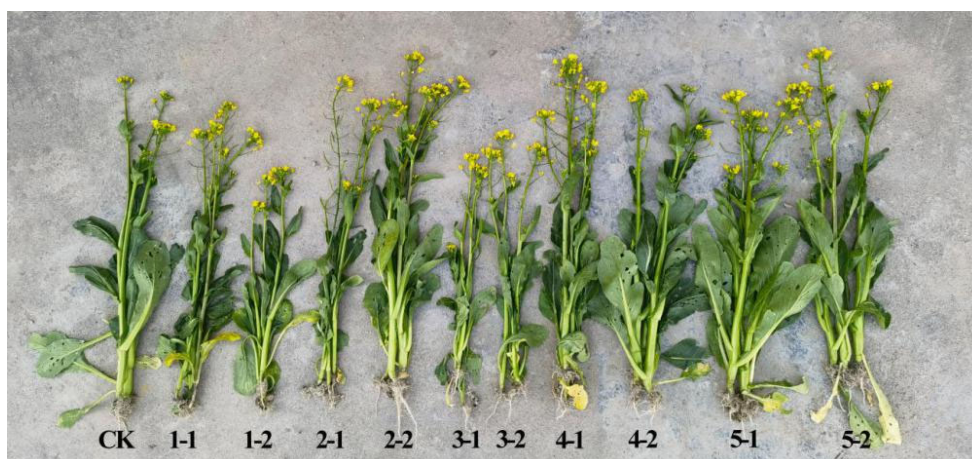

**Figure S2.** Effects of different pyraclostrobin formulations on growth of flowering cabbage.

**Table S1.** Grinding formula for preparing pyraclostrobin nano-SC.

| Components           | Raw materials                                                                                          | Dosage (wt%)   |
|----------------------|--------------------------------------------------------------------------------------------------------|----------------|
| Pesticide            | Pyraclostrobin                                                                                         | 25             |
| Dispersant           | Lignin dispersants Reax 80D, Reax 85A, polycarboxylate<br>D-3911, D-2912, D-2, SN-5040, TERSPERSE 2500 | 12             |
| pH controlling agent | Citric acid                                                                                            | A small amount |
| Disperse medium      | Deionized water                                                                                        | Added to 100%  |
|                      | Total                                                                                                  | 100            |

**Table S2.** Farmland experimental scheme of pyraclostrobin against cabbage downy mildew disease.

| Serial number | Formulation                          | Dilution times | Dosage of formulation (g) | Dosage of wetting agent (g) | D <sub>90</sub> particle size (before dilution) (nm) |
|---------------|--------------------------------------|----------------|---------------------------|-----------------------------|------------------------------------------------------|
| 1-1           | 25 wt% of pyraclostrobin SC          | 750            | 10                        | 0                           | 2985                                                 |
| 1-2           | 25 wt% of pyraclostrobin SC          | 500            | 15                        | 0                           | 2985                                                 |
| 2-1           | 25 wt% of pyraclostrobin nano-SC     | 750            | 10                        | 0                           | 215                                                  |
| 2-2           | 25 wt% of pyraclostrobin nano-SC     | 500            | 15                        | 0                           | 215                                                  |
| 3-1           | 25 wt% of pyraclostrobin SC          | 750            | 10                        | 0.5                         | 2985                                                 |
| 3-2           | 25 wt% of pyraclostrobin SC          | 500            | 15                        | 0.5                         | 2985                                                 |
| 4-1           | 25 wt% of pyraclostrobin nano-SC     | 750            | 10                        | 0.5                         | 215                                                  |
| 4-2           | 25 wt% of pyraclostrobin nano-SC     | 500            | 15                        | 0.5                         | 215                                                  |
| 5-1           | 25 wt% of pyraclostrobin EC (Kairun) | 750            | 10                        | 0                           | -                                                    |
| 5-2           | 25 wt% of pyraclostrobin EC (Kairun) | 500            | 15                        | 0                           | -                                                    |
| CK            | Water                                | -              | 15                        | 0                           | -                                                    |
